# Supplementary material
Source: PubMed Central journal article supplement (PMC4577523)
Supplement: NIHMS669042-supplement-1.pdf [file NIHMS669042-supplement-1.pdf]

## **Supplemental Materials**

DeMazumder et al., Cardiac resynchronization therapy restores sympathovagal balance in the failing heart by differential remodeling of cholinergic signaling. *Circulation Research* (2015)

**ONLINE FIGURE I: Schematic index of protocols employed for functional experiments on myocytes isolated from the LV lateral wall**

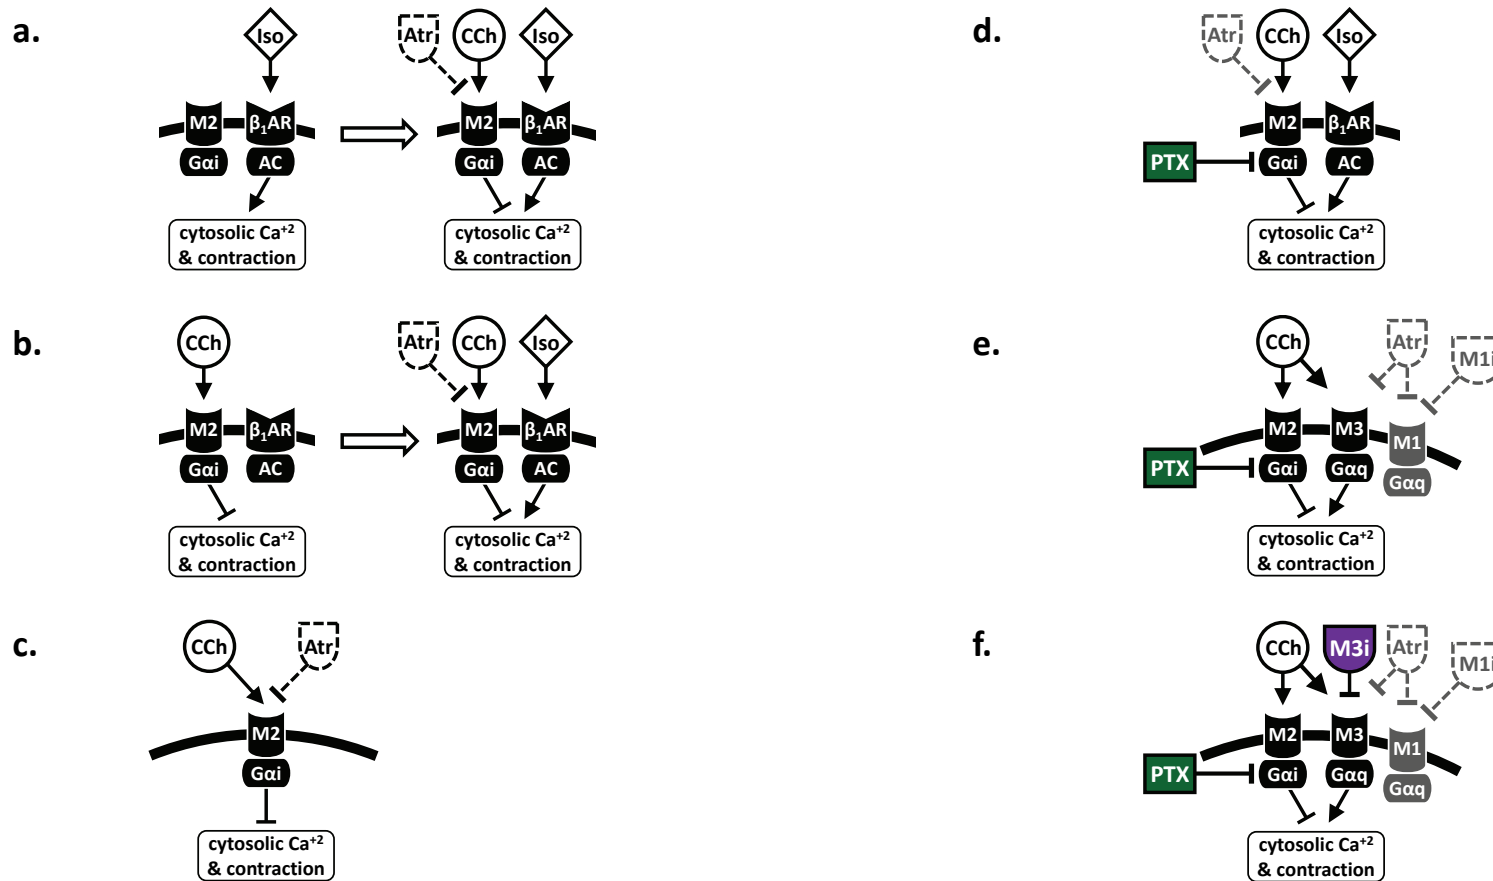

Each panel shows the schematic of a cardiomyocyte cell membrane containing  $\beta$ -adrenergic ( $\beta_1$ -AR) and/or muscarinic (M1, M2, M3 mAChR) receptors coupled to intracellular second messengers [Gai, Gaq, or adenylate cyclase (AC)]; the specific stimulators and/or inhibitors corresponding to the receptors that were employed in the solution exchange protocol are on top; the measured steady-state responses (calcium transient, sarcomere shortening) are at the bottom.

- Each myocyte was exposed first to isoproterenol (Iso) to stimulate  $\beta_1$ -AR. Then, carbamylcholine (CCh) was added to stimulate mAChRs in the continued presence of Iso. Finally, atropine (Atr) was added to assess reversal of mAChR-specific effects. The data from this protocol are shown in **Fig. 2a-c** and **Online Fig. 2a-b**.
- Similar to panel a, each myocyte was exposed first to CCh, then Iso in the continued presence of CCh, and finally Atr (data shown in **Fig. 3a-c** and **Online Fig. 3a-b**).
- The myocyte was first exposed to CCh alone followed by Atr (**Fig. 4a-c** and **Online Fig. 4a-b**).
- The protocol was same as in panel a, except that the experiments were performed in the presence of pertussis toxin (PTX; Gai inhibitor) (**Fig. 5c**, **Fig. 6a** and **Online Fig. 5a**).
- The protocol was same as in panel c, except for the presence of PTX and M1-mAChR-specific inhibitor (M1i) to assess for mAChR-stimulated effects not mediated by M2-Gai and M1-Gaq (**Fig. 6b** and **Online Fig. 5b**).
- The protocol was same as in panel e, except for the presence of M3-mAChR-specific inhibitor (M3i). Comparison of these data with those from panel e were used to assess for effects specific to the M3-mAChR (**Fig. 6b** and **Online Fig. 5c**).

**ONLINE FIGURE II: Response to cholinergic stimulation in the setting of tonic  $\beta$ -adrenergic stimulation**

**a. Peak response**

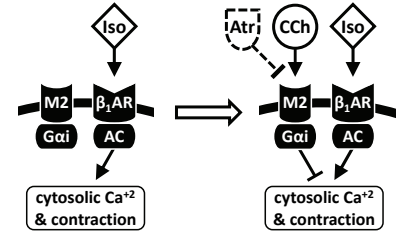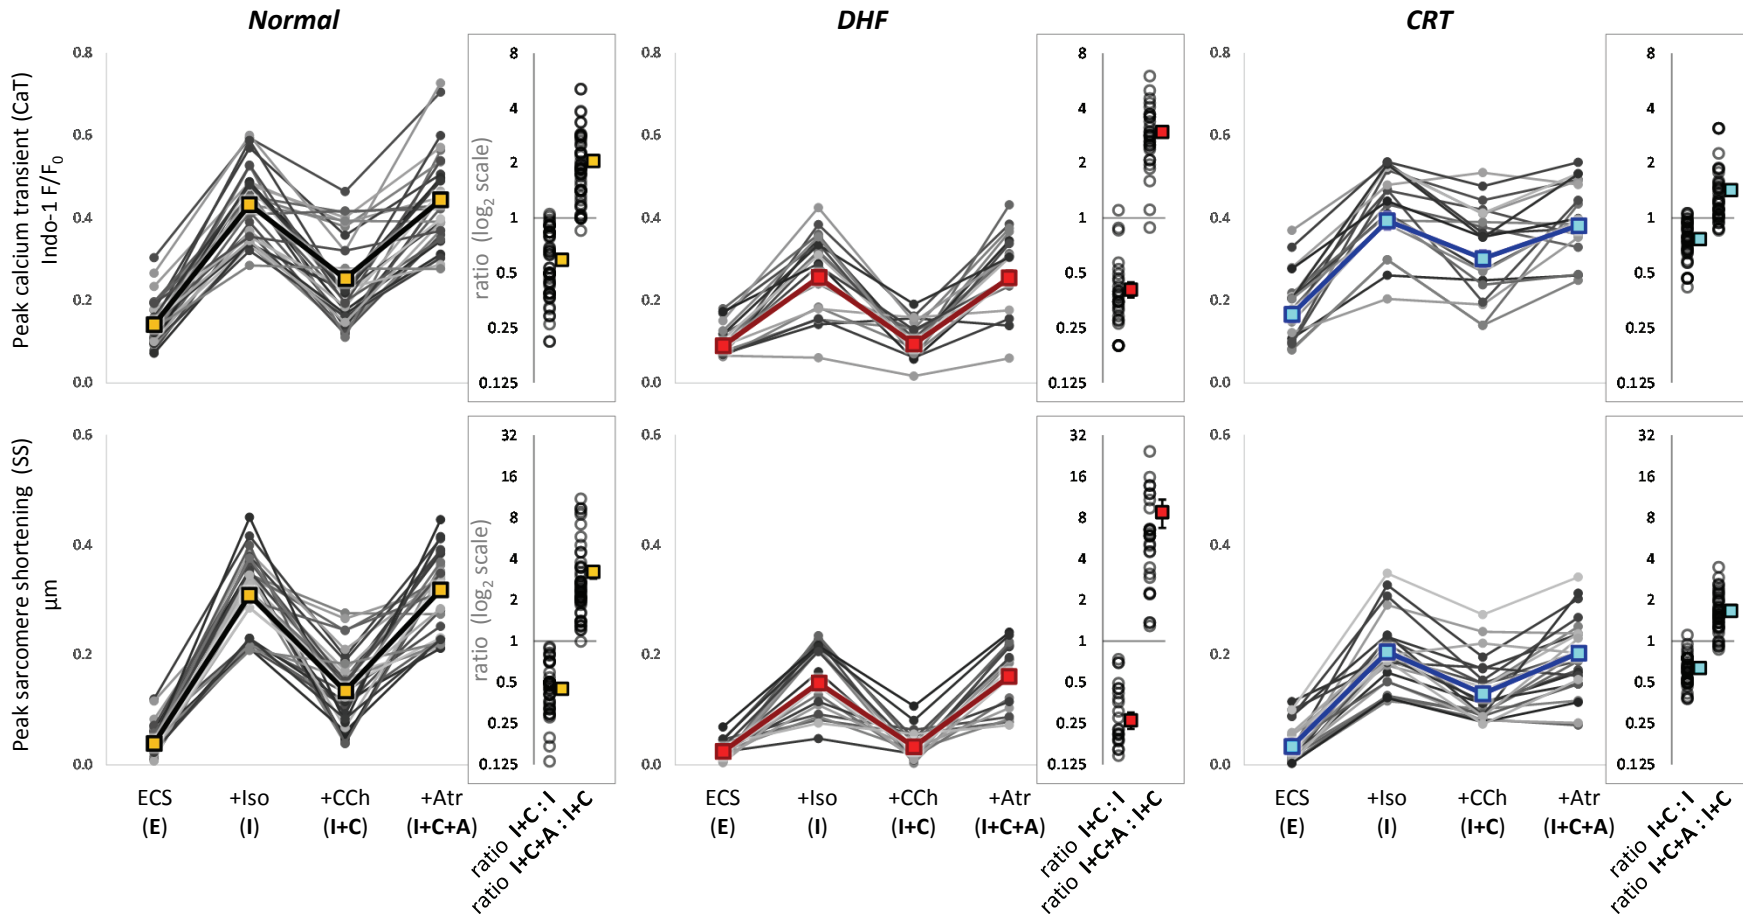

For each individual LV cardiomyocyte (grey filled circles) from normal controls (left column), DHF (middle) and CRT (right) animals (N=6-9 hearts/group), the peak CaT (top row) and SS (bottom) amplitudes are plotted for sequential exposures to ECS (E), Iso alone (I), Iso+CCh (I+C), and Iso+CCh+atropine (I+C+A). For each LV cardiomyocyte within groups, the inset (log<sub>2</sub> scale; grey empty circles) plots the ratio of the responses to CCh added to Iso compared to Iso alone (I+C:I) as well as the ratio of I+C+A:I+C. The corresponding mean $\pm$ SEM values are indicated by the colored filled markers.

The I+C+A:I+C ratio was larger than the I+C:I ratio within each inset for all groups (p<0.001); these ratios were also distinct between groups (p<0.001).

ONLINE FIGURE II (continued):

b. Time to 80% duration

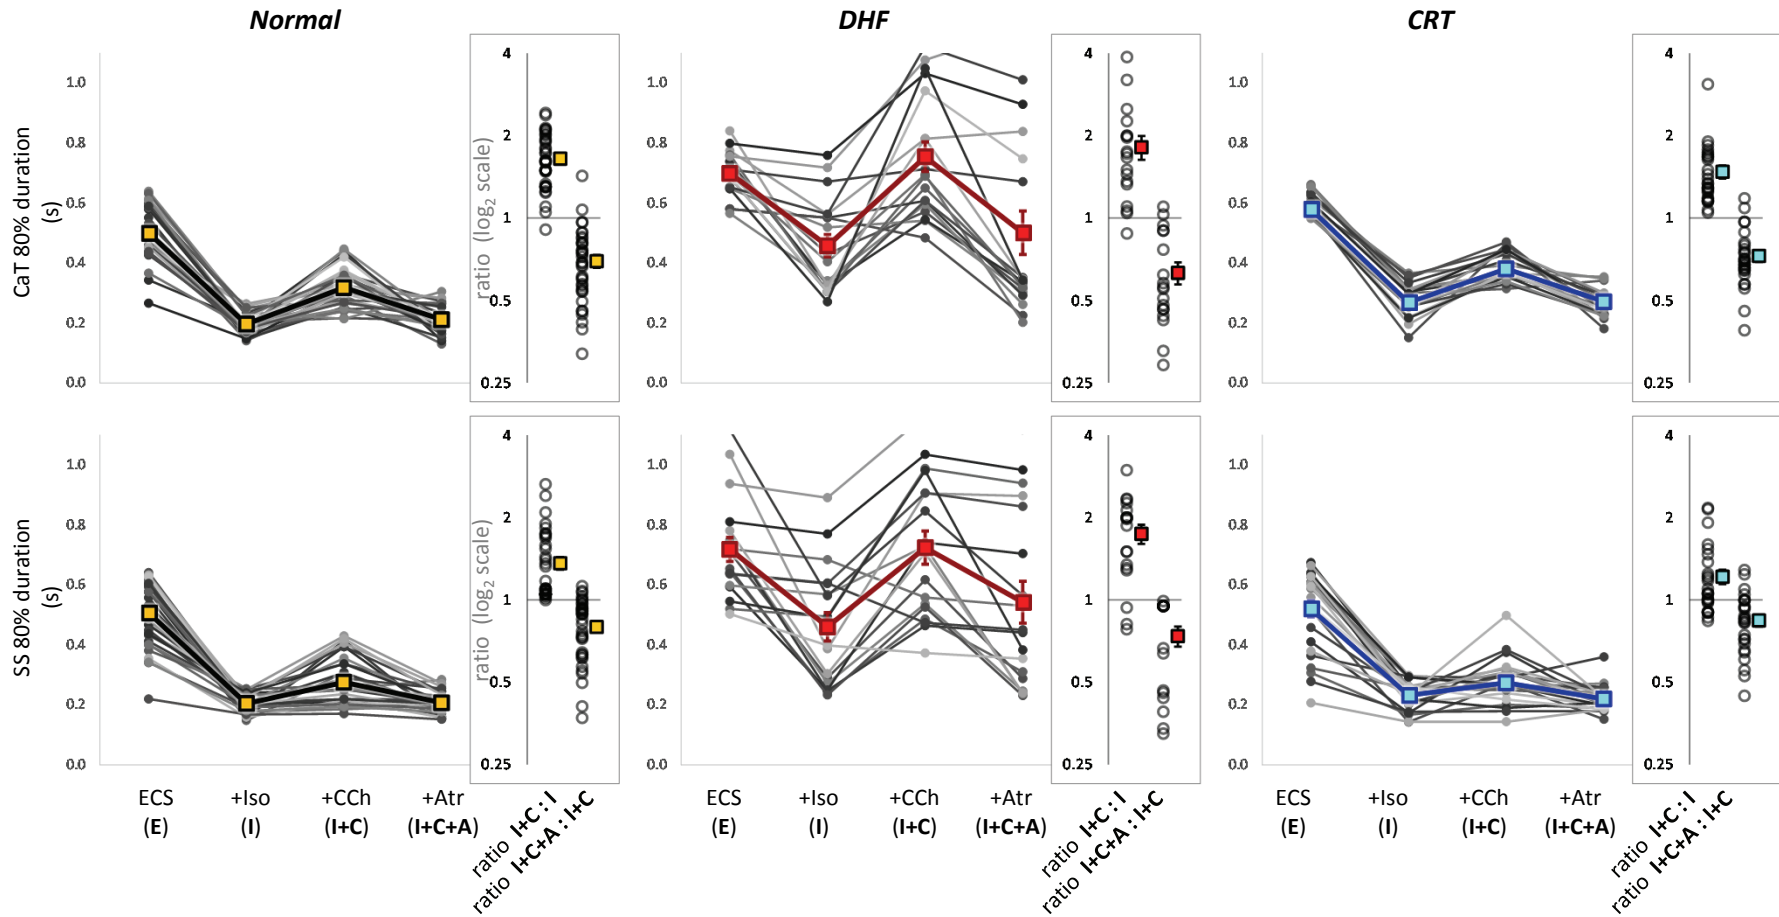

The 80% durations of the CaT (top row) and SS (bottom) are plotted in a format similar to that in Online Figure 2a.

The I+C+A:I+C ratio was larger than the I+C:I ratio within each inset for all groups ( $p < 0.01$ ). The SS I+C:I ratio in DHF was larger than those in normal or CRT ( $p < 0.01$ ).

**ONLINE FIGURE III: Response to  $\beta$ -adrenergic stimulation in the presence of tonic cholinergic stimulation**

**a. Peak response**

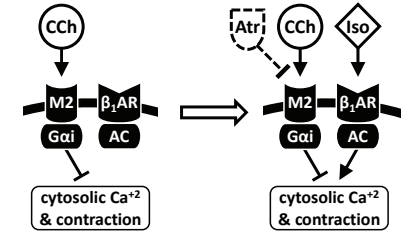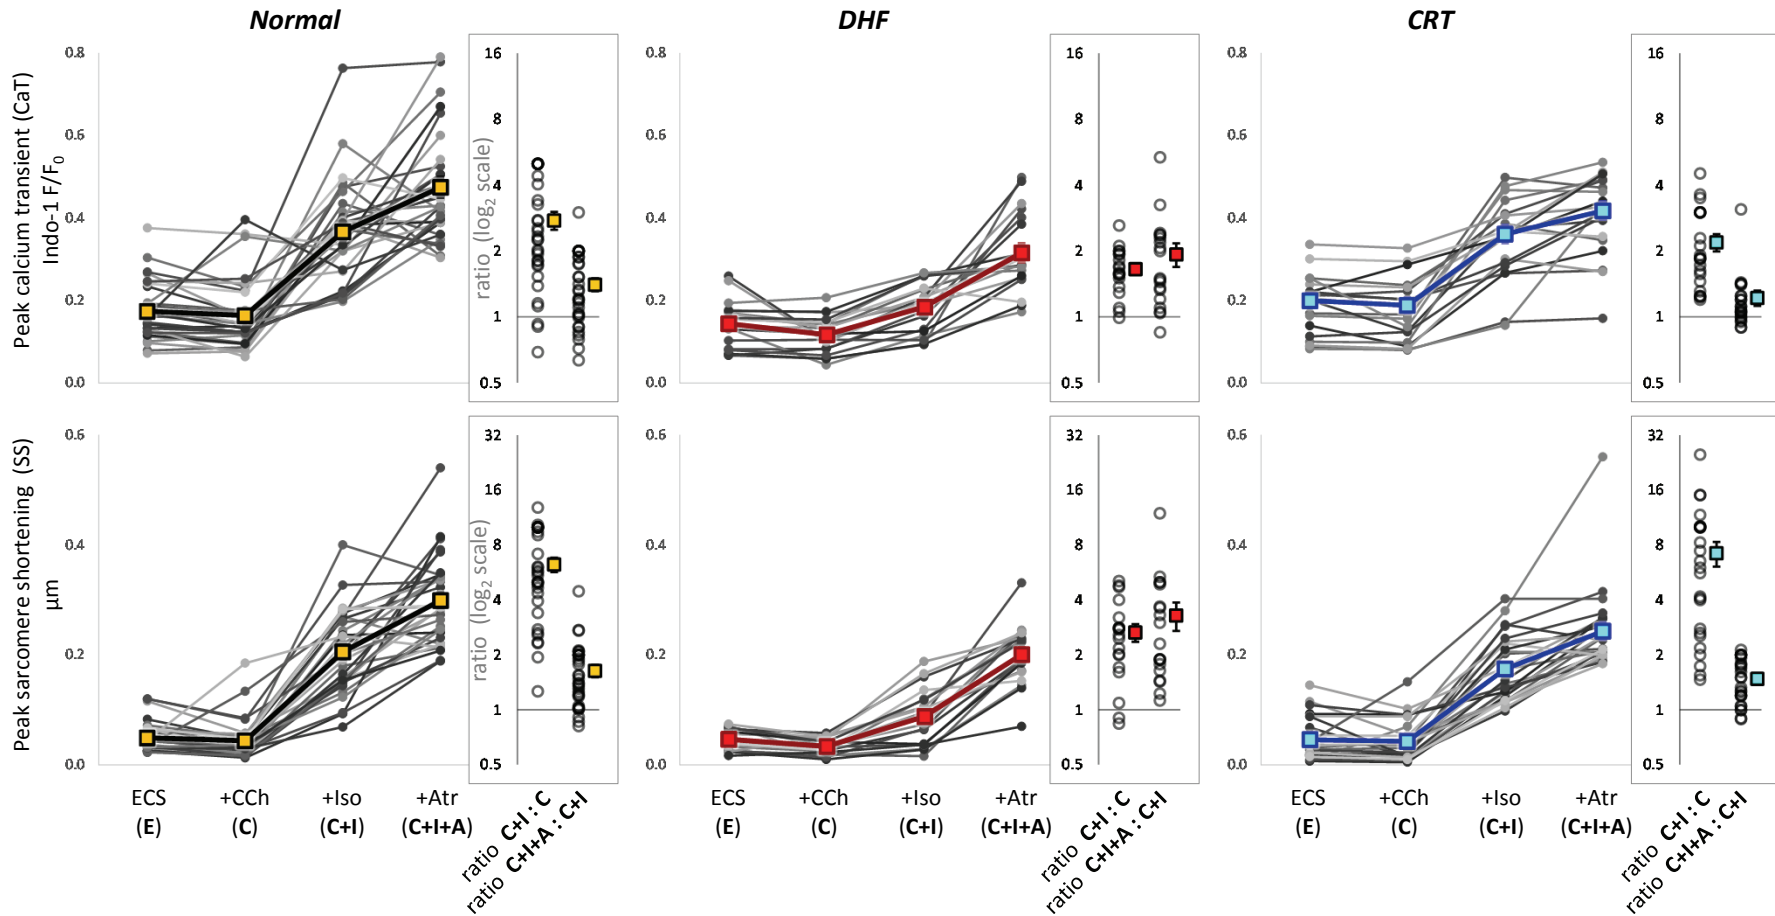

For each individual LV cardiomyocyte (grey filled circles) from normal controls (left column), DHF (middle) and CRT (right) animals (N=6-9 hearts/group), the peak CaT (top row) and SS (bottom) amplitudes are plotted for sequential exposures to ECS (E), CCh alone (C), CCh+Iso (C+I), and CCh+Iso+atropine (C+I+A). For each LV cardiomyocyte within groups, the inset (log<sub>2</sub> scale; grey empty circles) plots the ratio of the responses to Iso added to CCh compared to CCh alone (C+I:C) as well as the ratio of C+I+A:C+I. The corresponding mean±SEM values are indicated by the colored filled markers.

The I+C+A:I+C ratio was larger than the I+C:I ratio within each inset in normal and CRT (p<0.001) but not in DHF. Whereas the C+I:C ratios for the CaT and SS in DHF were smaller than those in normal or CRT (p<0.01), the C+I+A:C+I ratios in DHF were larger (p<0.05).

ONLINE FIGURE III (continued):

b. Time to 80% duration

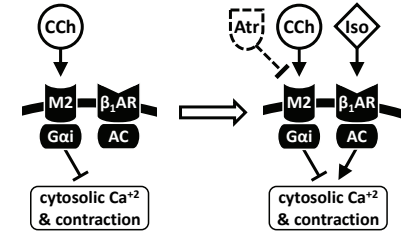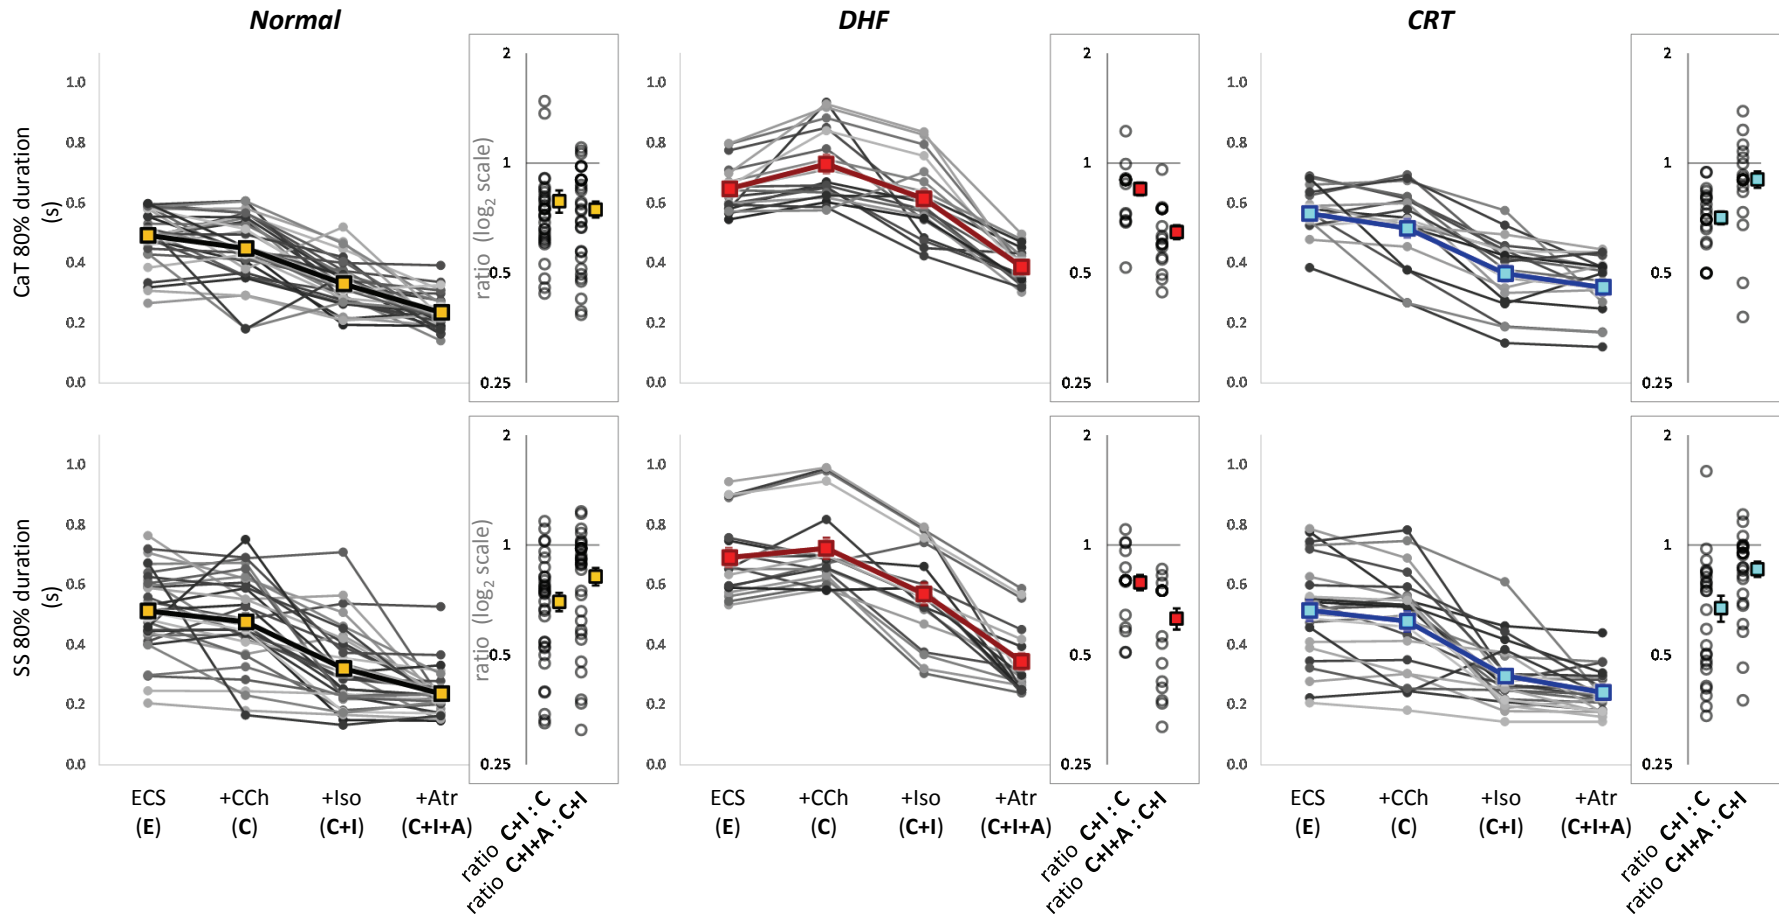

The 80% durations of the CaT (top row) and SS (bottom) are plotted in a format similar to that in Online Figure 3a.

The C+I+A:C+I ratio and the C+I:C ratio were significantly different within each inset in DHF and CRT ( $p < 0.05$ ), but these ratios were similar in normal controls. Whereas the C+I+A:C+I ratio was smaller than the C+I:C ratio in DHF, the converse was seen in CRT ( $p < 0.01$ ).

## ONLINE FIGURE IV: Cholinergic stimulation alone in normal, DHF and CRT

### a. Peak response

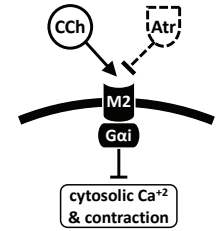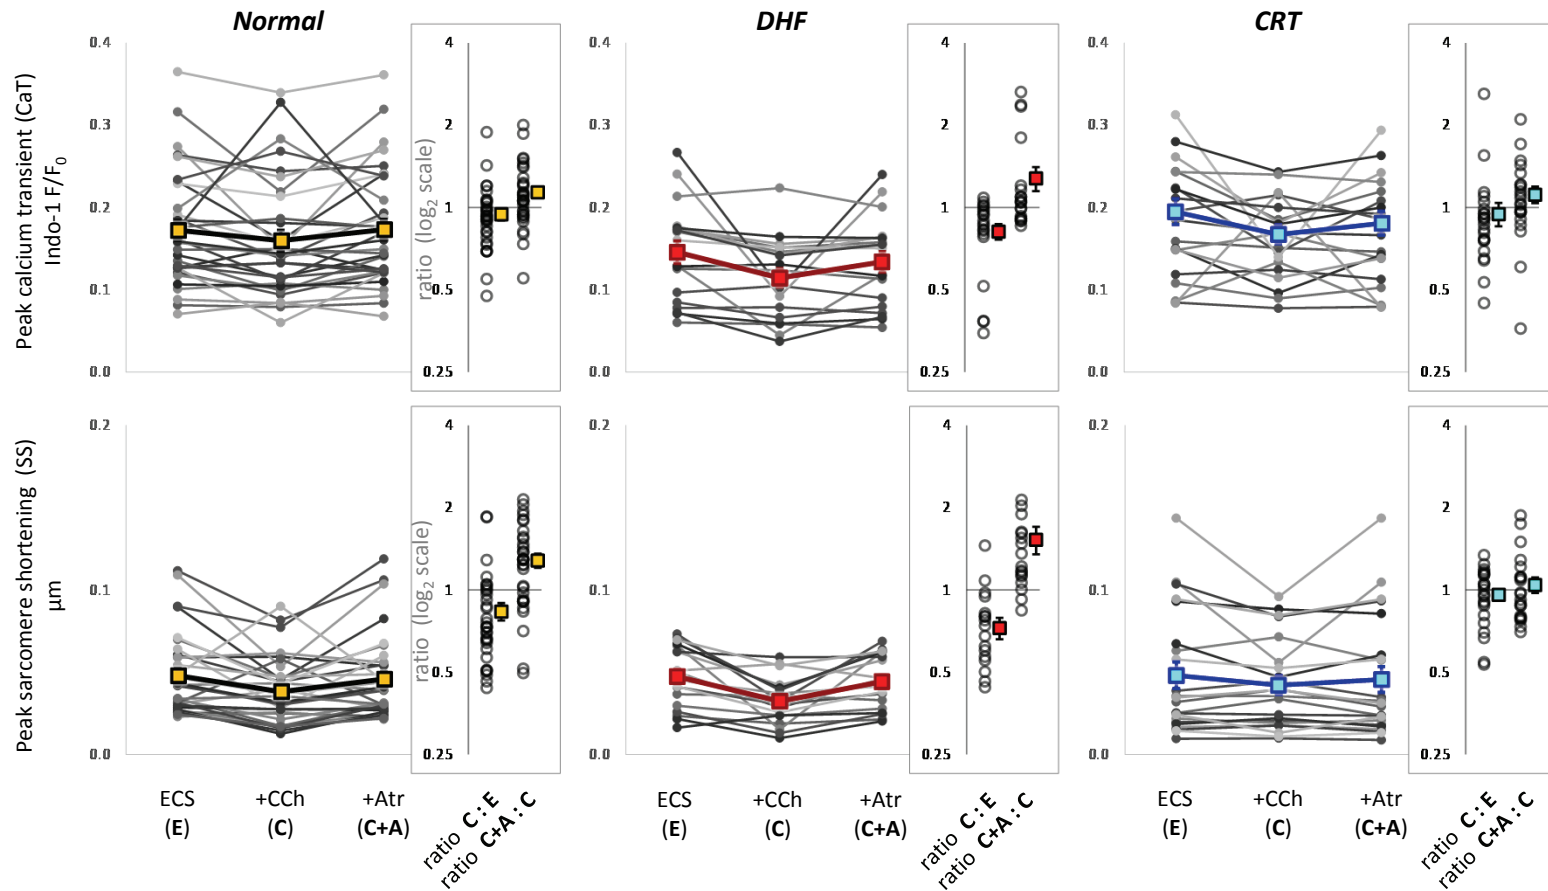

For each individual LV cardiomyocyte (grey filled circles) from normal controls (left column), DHF (middle) and CRT (right) animals (N=6-9 hearts/group), the peak CaT (top row) and SS (bottom) amplitudes are plotted for sequential exposures to ECS (E), CCh alone (C), and CCh+atropine (C+A). For each LV cardiomyocyte within groups, the inset (log<sub>2</sub> scale; grey empty circles) plots the ratio of the responses to CCh compared to ECS alone (C:E) as well as the ratio of C+A:C. The corresponding mean±SEM values are indicated by the colored filled markers.

The C+A:C ratio was larger than the C:E ratio within each inset in normal and DHF (p<0.05) but these ratios were similar in CRT.

ONLINE FIGURE IV (continued):

b. Time to 80% duration

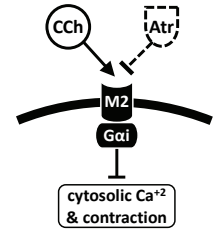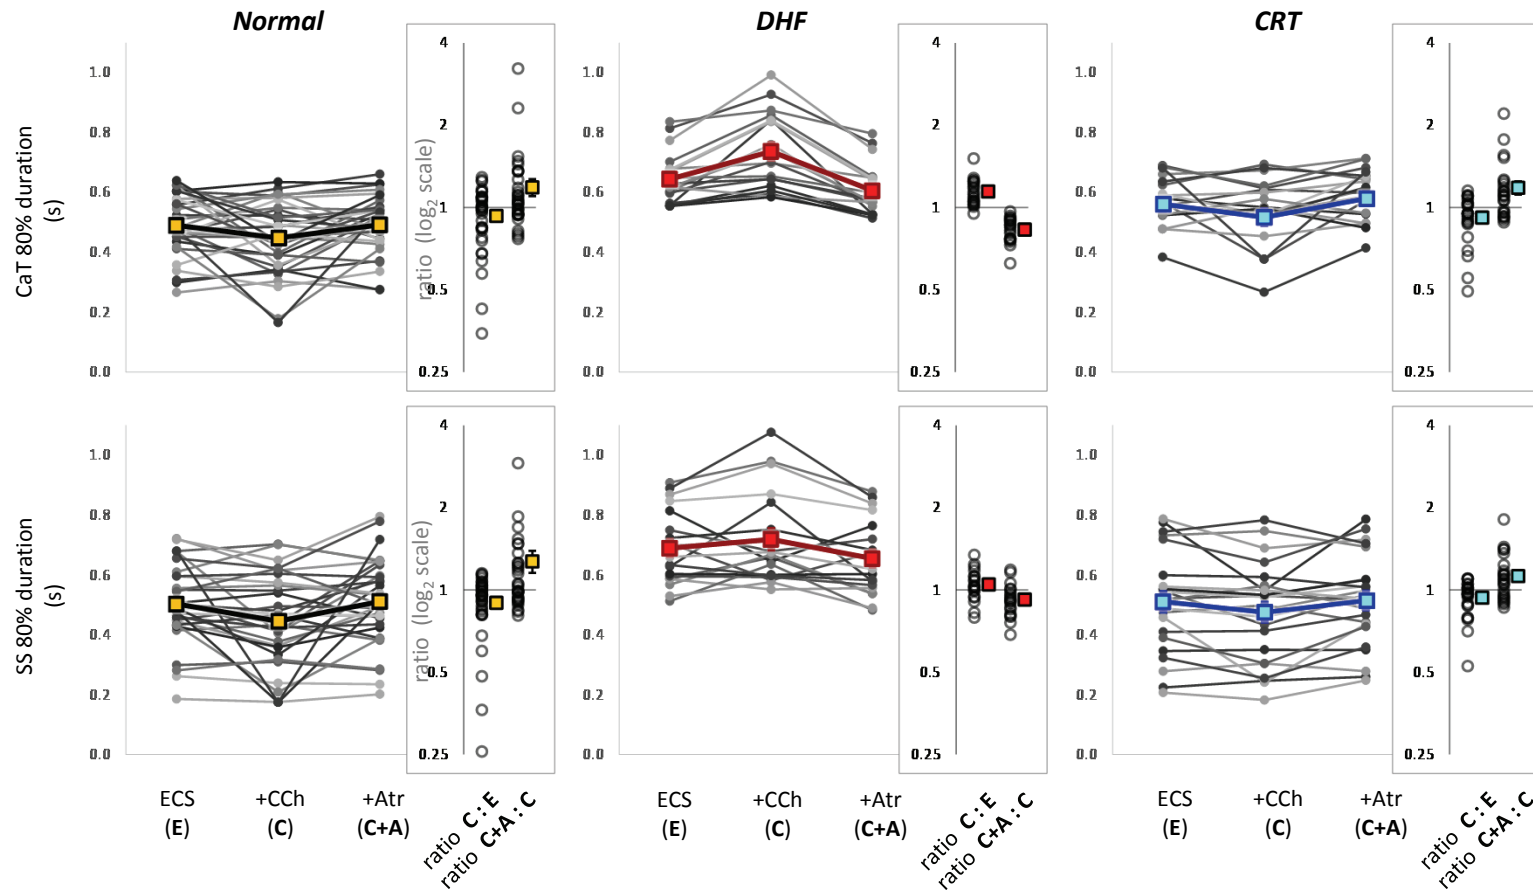

The 80% durations of the CaT (top row) and SS (bottom) are plotted in a format similar to that in Online Figure 4a.

For all groups, the C+A:C ratio was significantly different from the C:E ratio within each inset ( $p < 0.05$ ). Whereas the C+A:C ratio was larger than the C:E ratio in DHF, the converse was seen in normal and CRT ( $p < 0.05$ ).



**ONLINE FIGURE V: Distinct effects of M2- and M3- muscarinic receptor signaling**

**a. Peak response to cholinergic stimulation in the presence of tonic  $\beta$ -adrenergic stimulation and PTX ( $G\alpha_i$  inhibitor)**

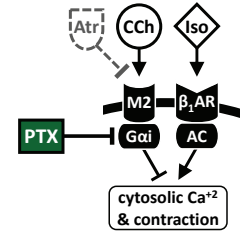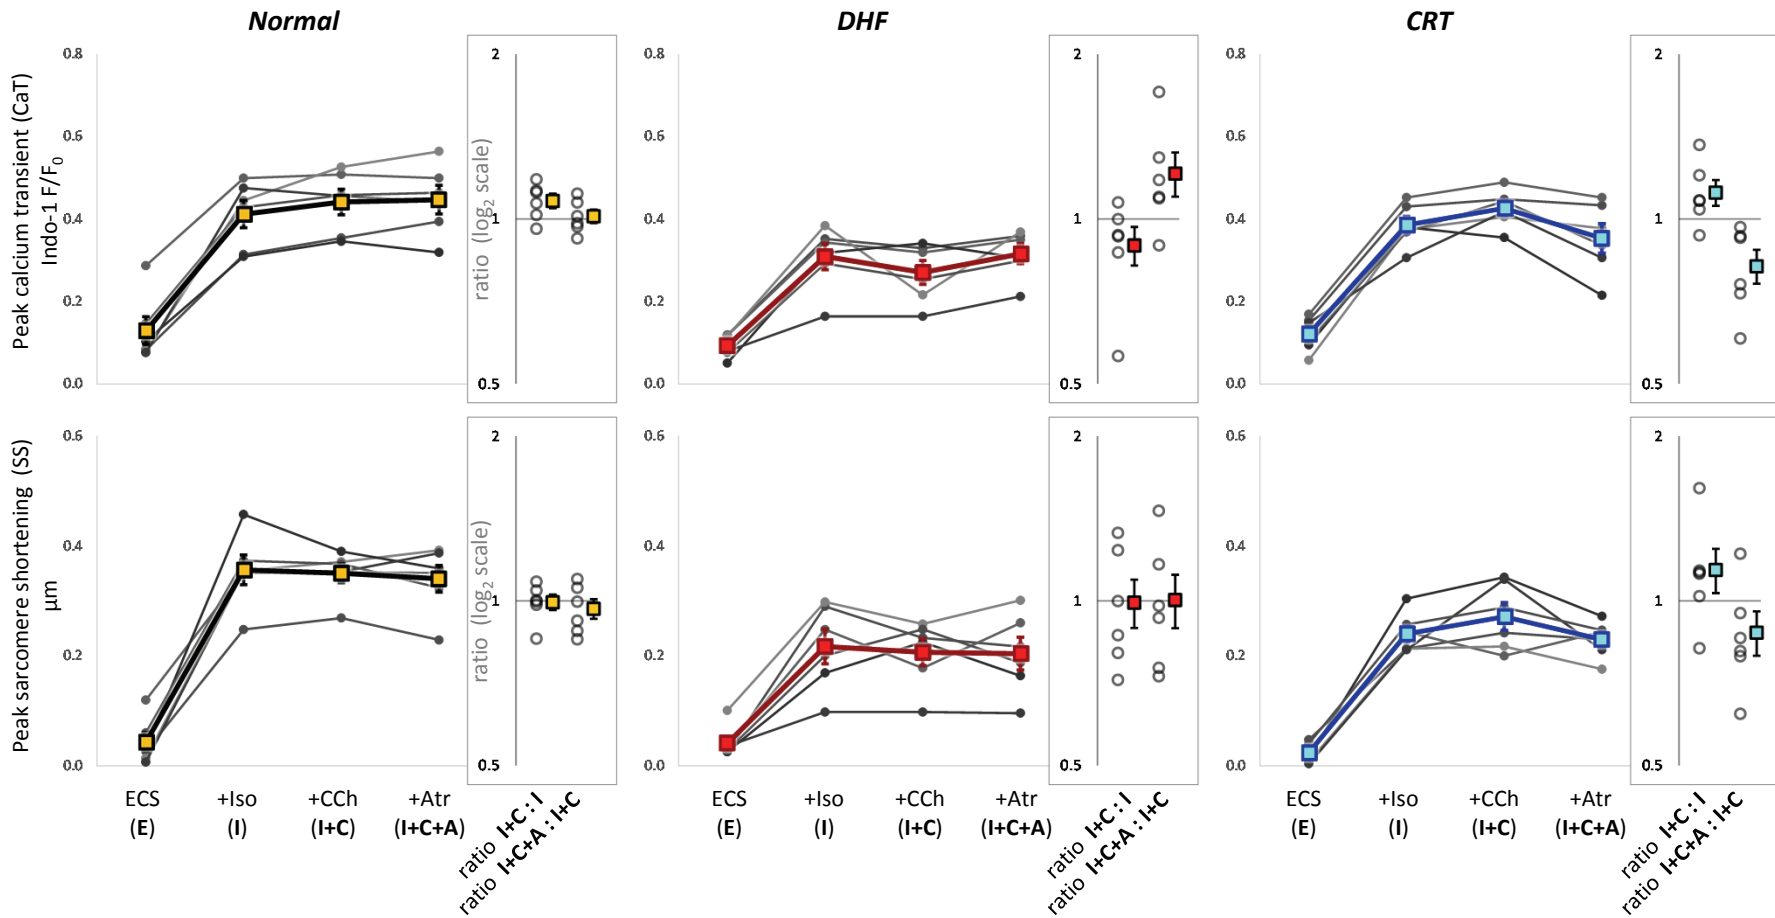

The 80% durations of the CaT (top row) and SS (bottom) are plotted in a format similar to that in Online Figure 2a.

Compared to the data in the absence of PTX (Online Fig. 2a), the corresponding I+C+A:I+C ratios and the I+C:I ratios were significantly diminished for all groups ( $p < 0.0001$ ).

ONLINE FIGURE V (continued):

b. Peak response to cholinergic stimulation alone in the presence of PTX (Gαi inhibitor)

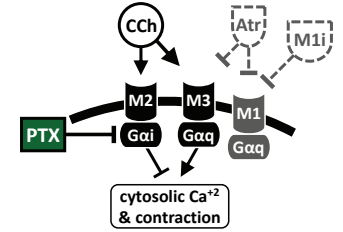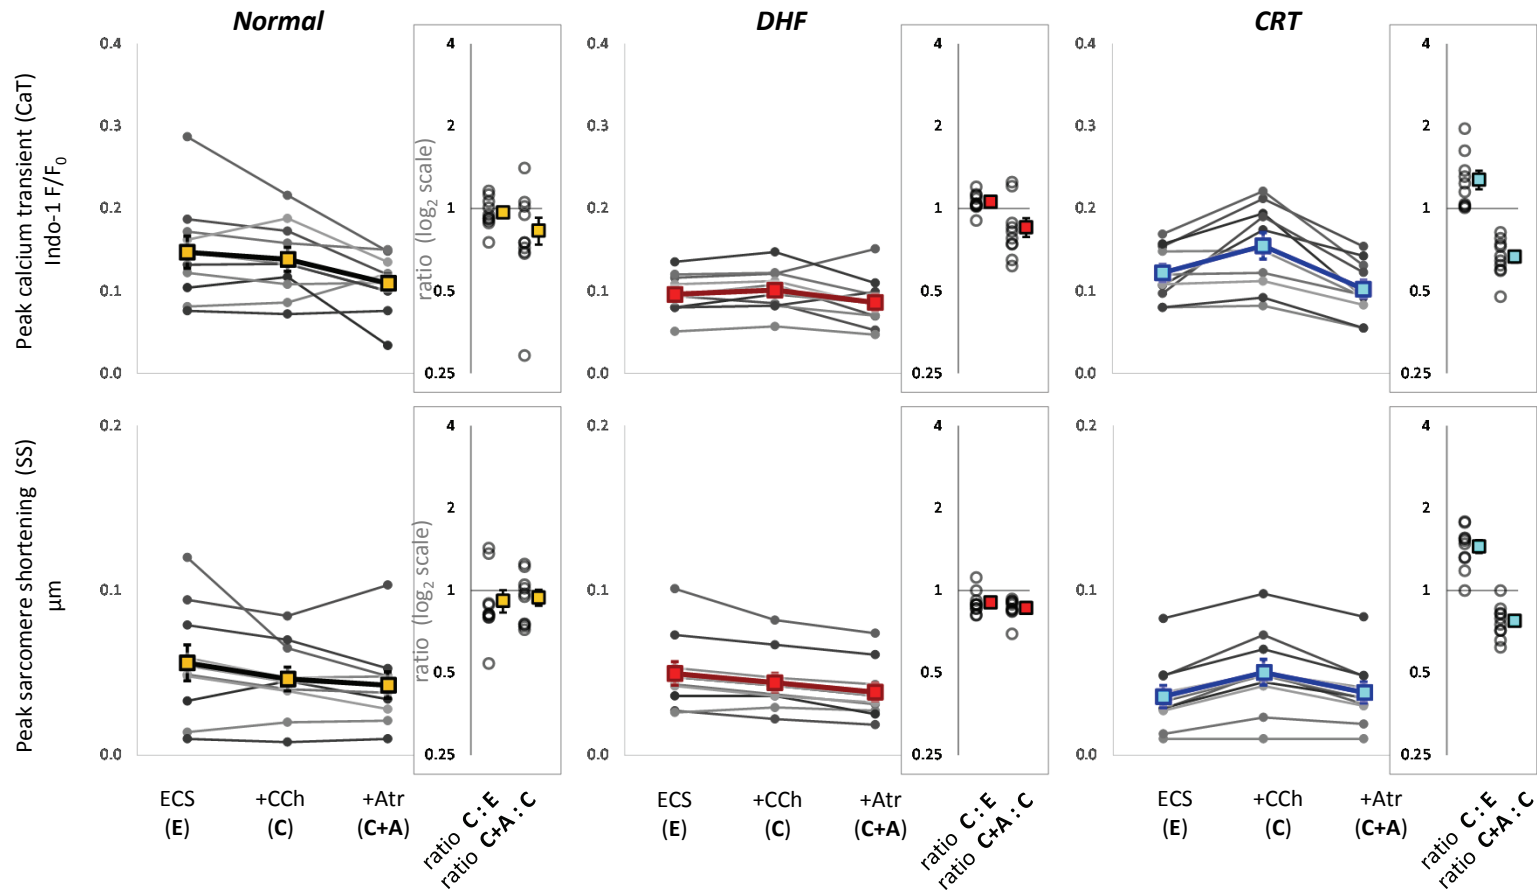

The peak CaT (top row) and SS (bottom) amplitudes in the presence of PTX and an M1-mAChR-specific inhibitor are plotted in a format similar to that in Online Figure 4a.

The C:E ratios for the CaT and SS in CRT were larger than those in normal and DHF ( $p < 0.05$ ), and the C+A:C ratios in CRT were smaller than those in normal and DHF ( $p < 0.05$ ).

ONLINE FIGURE V (continued):

c. Peak response to cholinergic stimulation alone in the presence of PTX (Gai inhibitor) and M3-receptor inhibitor

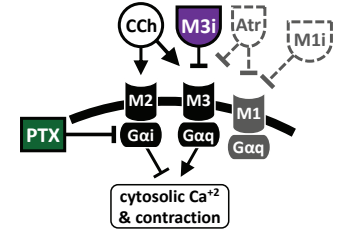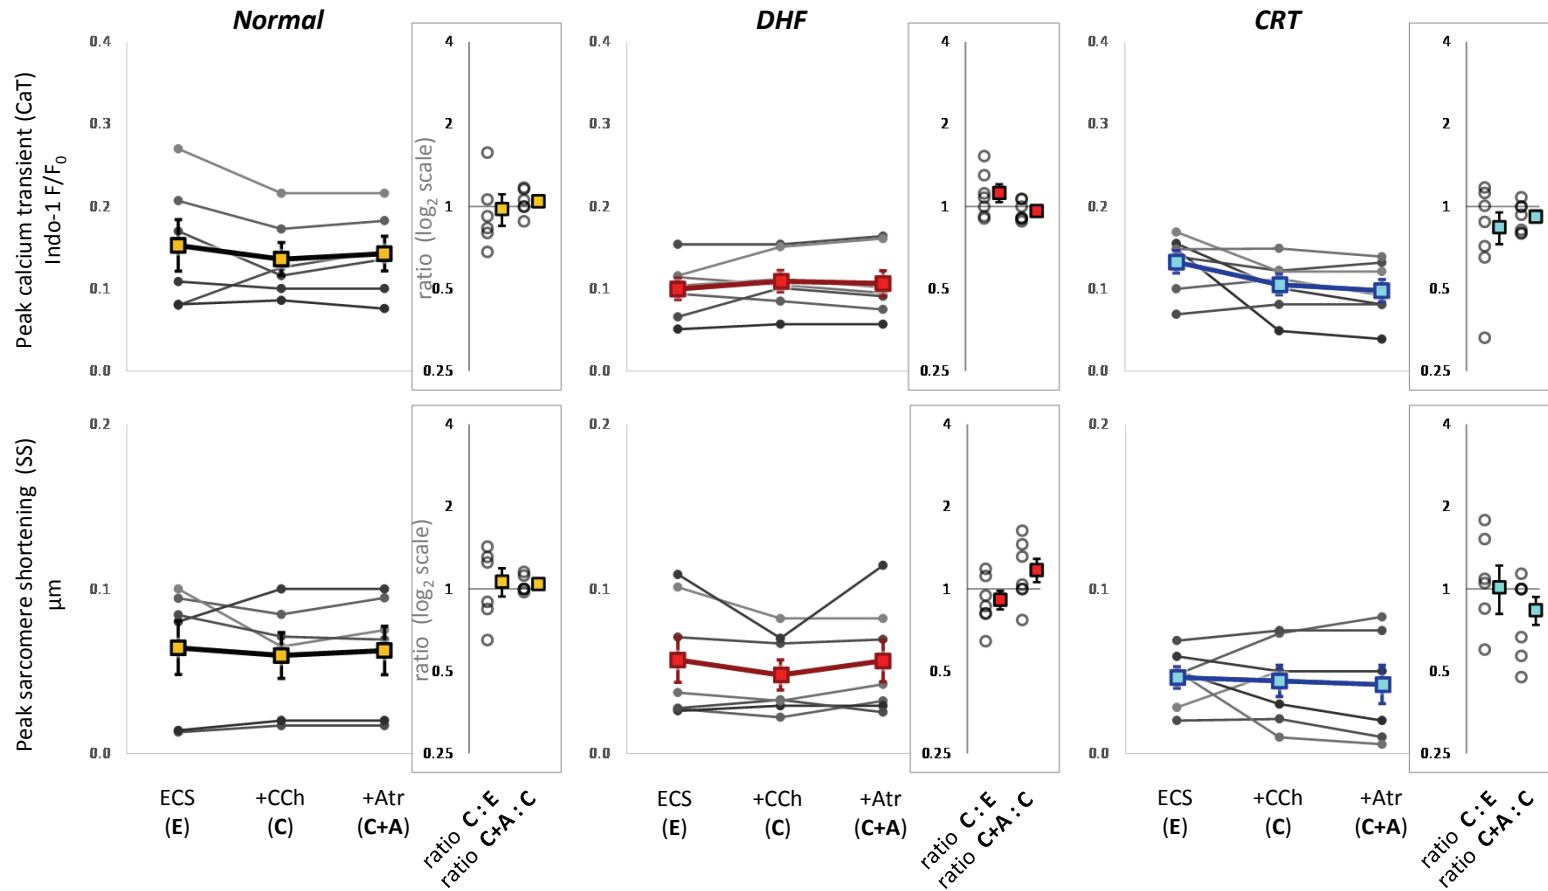

The peak CaT (top row) and SS (bottom) amplitudes in the presence of PTX, an M1-mAChR-specific inhibitor and an M3-mAChR-specific inhibitor are plotted in a format similar to that in Online Figure 4a.

For all groups, the C+A:C ratio was similar to the C:E ratio within each inset. Compared to the absence of an M3-mAChR inhibitor (Online Fig. 5b), the corresponding C+A:C ratios for the CaT and SS were significantly different in CRT ( $p < 0.05$ ) but they were the same in DHF and normal.
